# Supplementary material for: Smart Packaging with Disposable NFC-enabled Wireless Gas Sensors for Monitoring Food Spoilage
Source: PubMed Central journal article supplement (PMC11686504; doi:10.1021/acssensors.4c02510), 2024-12-16
Supplement: se4c02510_si_002.pdf [file se4c02510_si_002.pdf]

# Smart Packaging with Disposable NFC-enabled Wireless Gas Sensors for Monitoring Food Spoilage

*Atharv Naik<sup>1</sup>, Hong Seok Lee<sup>1</sup>, Jack Herrington<sup>1</sup>, Giandrin Barandun<sup>1,2</sup>, Genevieve Flock<sup>3</sup>,*

*Firat Güder<sup>1,4\*</sup> and Laura Gonzalez-Macia<sup>1\*</sup>*

<sup>1</sup> Department of Bioengineering, Imperial College London, London SW7 2AZ, United Kingdom

<sup>2</sup> BlakBear Ltd, 185 Tower Bridge Rd, London SE1 2UF, United Kingdom

<sup>3</sup> Combat Capabilities Development Command Soldier Center, Natick, MA 01760, United States

<sup>4</sup> Bezos Centre for Sustainable Protein, Imperial College London, London SW7 2AZ, United Kingdom

\*Corresponding Authors: [guder@imperial.ac.uk](mailto:guder@imperial.ac.uk), [m.gonzalez-macia@imperial.ac.uk](mailto:m.gonzalez-macia@imperial.ac.uk)

**Table S1.** Material specifications for the membranes used to encapsulate PEGS.

| Commercial name                                 | Short name | Material     | Thickness (mm) | Biocompatibility                                                            |
|-------------------------------------------------|------------|--------------|----------------|-----------------------------------------------------------------------------|
| POREX Porous PTFE Medical Materials MD25        | MD25       | PTFE         | 0.19           | Use for medical applications <sup>1</sup>                                   |
| Nitto TEMISH porous PTFE S-NTF8031J             | TEMISH     | PTFE         | 0.13           | Applications: medical face masks, respirators, air purifiers <sup>2</sup>   |
| 3M™ Medical Film 9832F, Polyurethane            | PU         | Polyurethane | 0.02           | Suitable for wound care dressings and wearable devices <sup>3</sup>         |
| Biaxially oriented polyester (OPET) film (OCLF) | mPET       | PET          | 0.0127         | Food packaging industry <sup>4</sup>                                        |
| Cellulose-based compostable sealing film        | Cellulose  | Cellulose    | --             | Food packaging industry <sup>4</sup>                                        |
| Polyurethane-based tattoo film                  | Tattoo     | Polyurethane | --             | Tattoo Wrap Waterproof Wound Antibacterial Transparent Bandage <sup>5</sup> |

<sup>1</sup>MD25 – POREX Virtek PTFE Hydrophobic Medical Venting Porous Membrane Sheets, <https://www.porex.com/product/porex-virtek-ptfe-hydrophobic-medical-venting-porous-membrane-sheets-md25/>; <sup>2</sup> [https://www.nitto.com/eu/en/products/temish\\_search/about/](https://www.nitto.com/eu/en/products/temish_search/about/); <sup>3</sup>[https://www.3m.co.uk/3M/en\\_GB/p/d/v000266868/](https://www.3m.co.uk/3M/en_GB/p/d/v000266868/); <sup>4</sup>Bullseye Food Packaging <https://www.bfpuk.com/>; <sup>5</sup> Patrick F. McClernon, Russell Blette, Donna Dearing, *Transparent breathable polyurethane film for tattoo aftercare and method*, WO 2010/042511 A1.

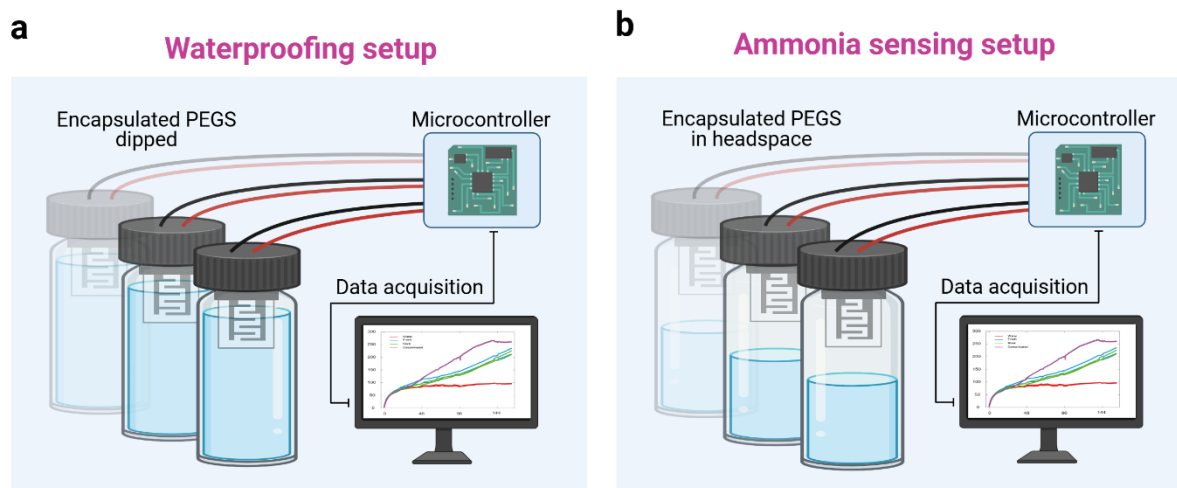

**Figure S1.** **a** Scheme of experimental setup used to evaluate the waterproofing properties of the encapsulation membranes (PEGs dipped into DI water). **b** Scheme of experimental setup used to measure changes in conductance over time of encapsulated PEGs placed in the headspace of a vial containing 1 mM  $\text{NH}_4\text{OH}$  solution and comparison to non-encapsulated PEGs response.

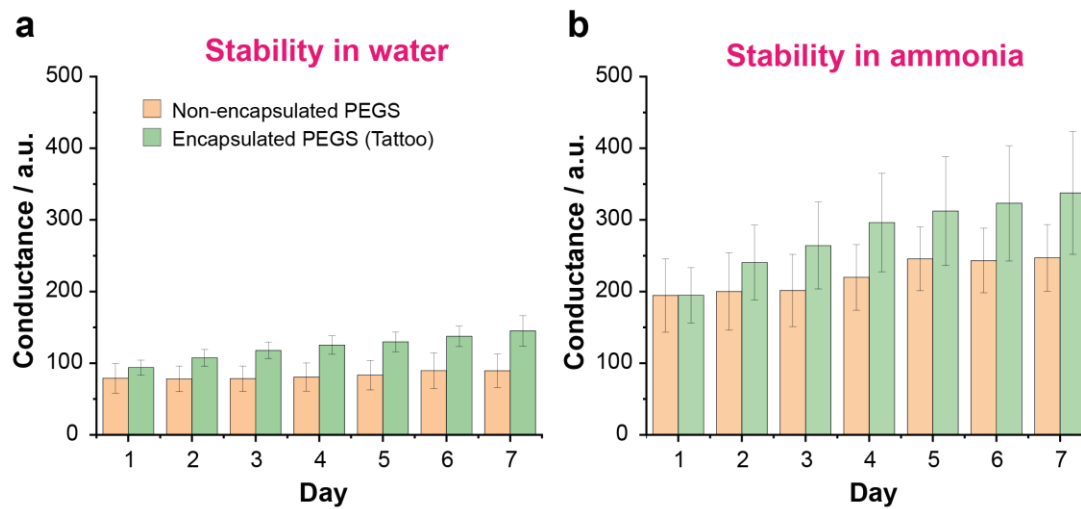

**Figure S2.** Stability study of non-encapsulated PEGS and PEGS encapsulated with polyurethane-based tattoo film. Sensors were continuously exposed to: **a** water, and **b** 1 mM  $\text{NH}_4\text{OH}$  and the conductance changes were recorded for one week ( $n = 4$ ).

**Table S2.** Breakdown of the cost for the fabrication of the NFC-enabled system integrated with encapsulated PEGS (Tattoo film) for the monitoring of spoilage in spinach

| <b>Component</b>                | <b>Price per unit (USD)</b> |
|---------------------------------|-----------------------------|
| PEGS                            | 0.02                        |
| 3M 9703 Conductive Tape         | 0.06                        |
| SIC4341 Chip                    | 0.01                        |
| Passive components (capacitors) | 0.01                        |
| Flexible PCB                    | 0.16                        |
| Tattoo film                     | 0.08                        |
| <b>TOTAL (USD)</b>              | <b>0.35</b>                 |

**Supplemental video.** Video showing the procedure for the monitoring of spoilage in bagged spinach using the NFC-enabled system integrated with encapsulated PEGS (Tattoo film). A user-friendly version app was used to communicate the level of spinach freshness by “Fresh” or “Not Fresh” messages.
